# Supplementary figures and images for: Effects of dietary tryptophan supplementation in the acetic acid-induced colitis mouse model
Source: Royal Society of Chemistry journal article supplement (doi:10.1039/c8fo01025k), 2018-01-01

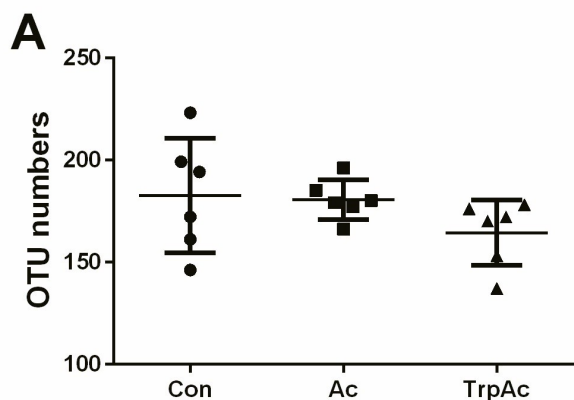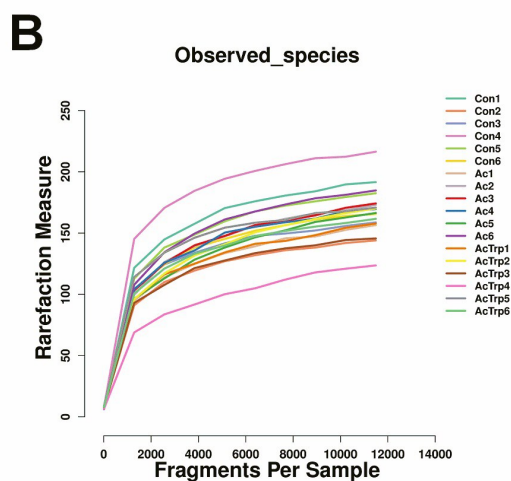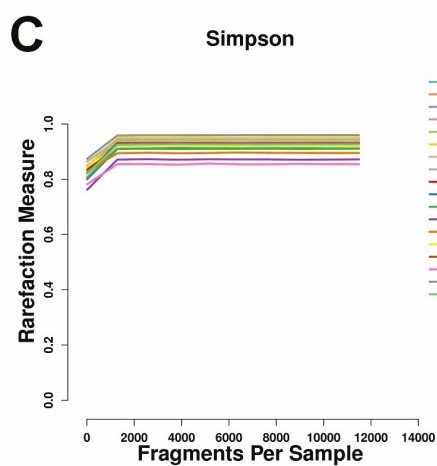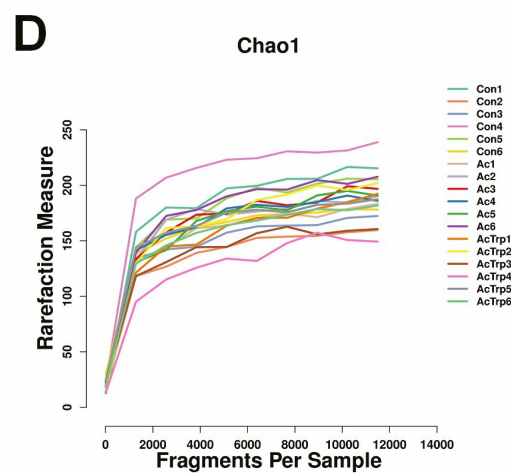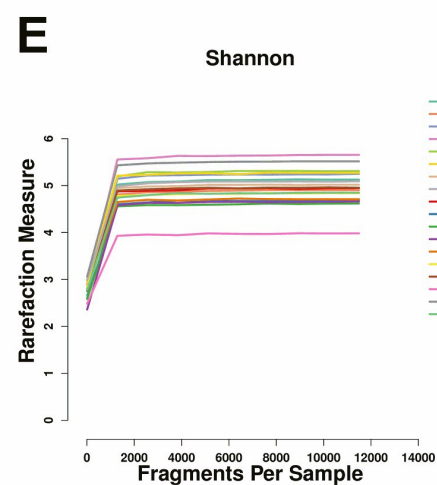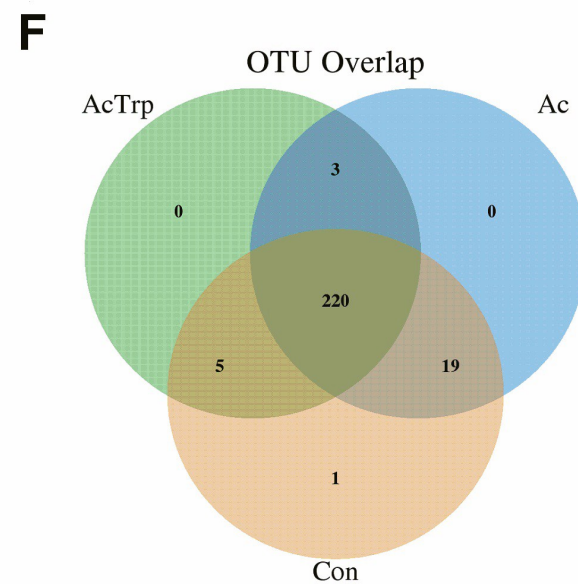

Supplement: c8fo01025k2.pdf [file c8fo01025k2.pdf]
